# Supplementary material
Source: PubMed Central journal article supplement (PMC5568467)
Supplement: NIHMS888123-supplement-1.pdf [file NIHMS888123-supplement-1.pdf]

**Alpha-toxin regulates local granulocyte expansion from hematopoietic stem and progenitor cells in *Staphylococcus aureus*-infected wounds**

Patrick C. Falahee,<sup>1\*</sup> Leif S. Anderson,<sup>1\*</sup> Mack B. Reynolds,\* Mauricio Pirir,\* Bridget E. McLaughlin,† Carly A. Dillen, § Ambrose L. Cheung, ‡ Lloyd S. Miller, § and Scott I. Simon\*

**Supplementary Material**

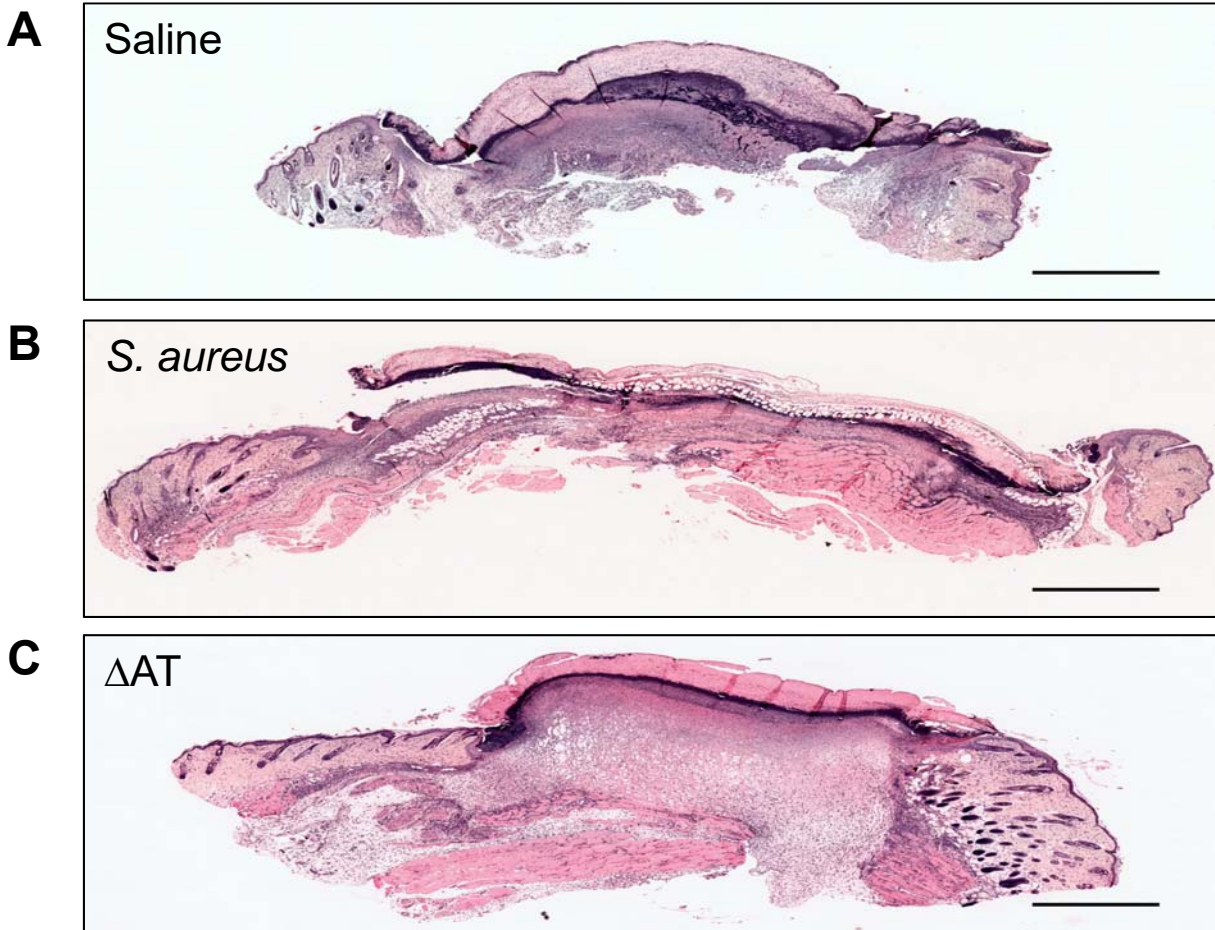

**Supplemental Figure 1. Histological comparison of wound healing between mice inoculated with saline or *S. aureus* versus  $\Delta$ AT.** C57BL/6 mice were wounded and inoculated with either sterile saline or  $1 \times 10^7$  CFU of *S. aureus* versus  $\Delta$ AT. At day 3 post inoculation, mice were euthanized and wound tissue biopsied. Samples were immediately embedded in paraffin and sectioned for H&E staining. Representative photomicrographs of sections from mice of each treatment group are shown. Scale bars = 200  $\mu$ m.

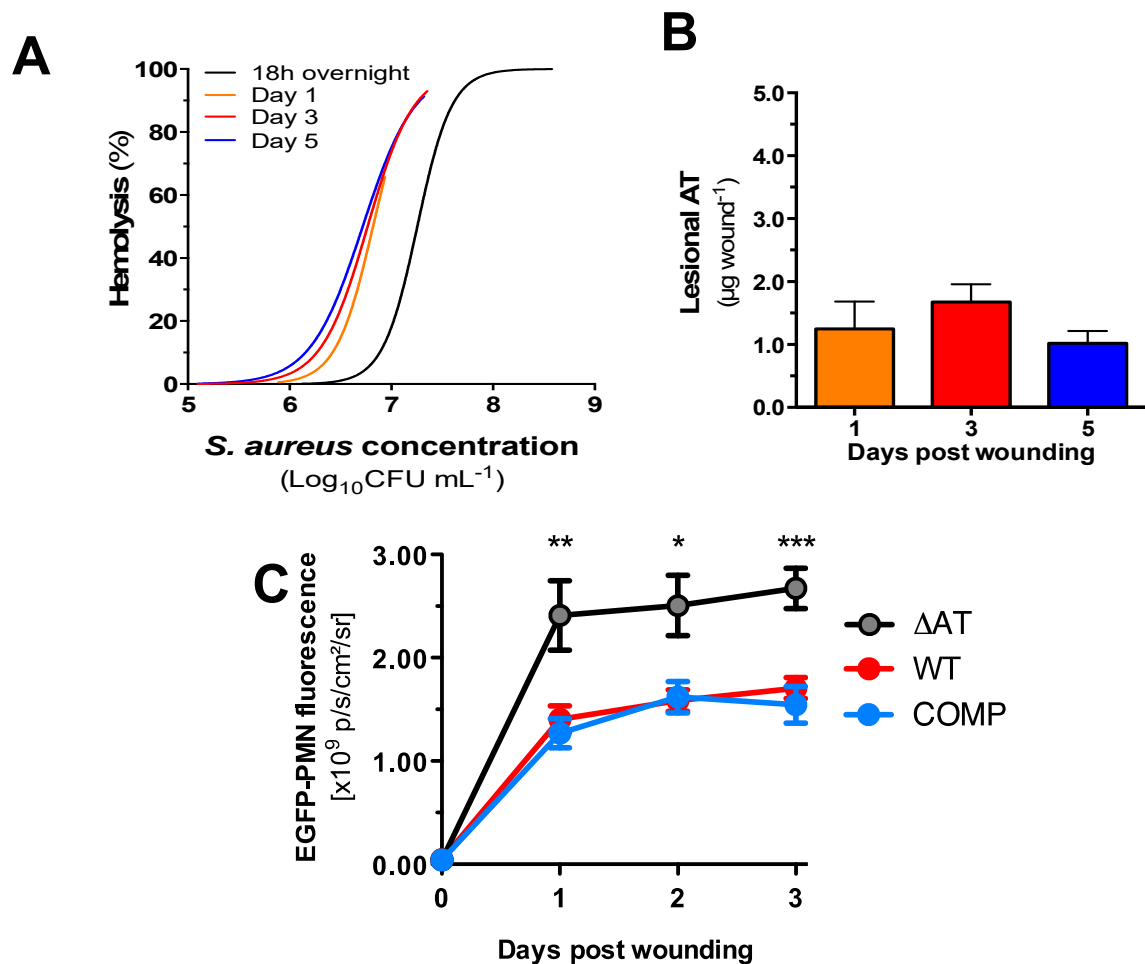

**Supplemental Figure 2. Alpha toxin activity correlates closely with bacterial abundance.**

(A) Rabbit erythrocytes were co-incubated with various concentrations of 0.2 µm-filtered overnight culture supernatants (black line) or homogenized wound tissue collected at either 1, 3 or 5 days post wounding and inoculation with *S. aureus*. Hemolytic activity was calculated based on the absorbance at 450 nm. (B) Alpha toxin protein expression from homogenized wound tissue collected 1, 3, and 5 day post wounding and inoculation with WT *S. aureus* as measured by ELISA. (C) LysM-EGFP mice were wounded and inoculated with  $1 \times 10^7$  CFU of WT, ΔAT or ΔAT-comp *S. aureus*, and EGFP-PMN fluorescence was measured at wound sites daily over 3 days. Data are derived from 5-8 mice per group and are expressed as mean±SEM. \*  $p < .05$ , \*\*  $p < .01$ , \*\*\*  $p < .001$ , *S. aureus* and ΔAT-comp versus ΔAT .

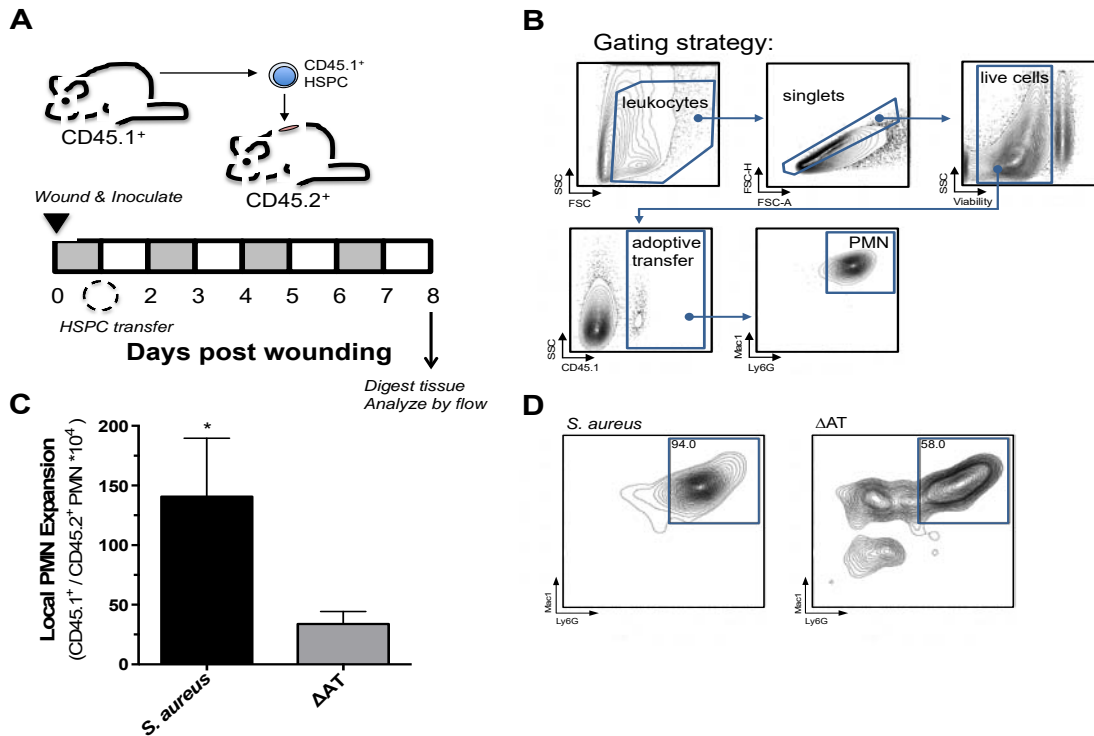

**Supplemental Figure 3. Flow cytometric analysis of wounds following expansion of HSPC.**

(A) C57BL/6 mice ( $CD45.2^+$ ) were wounded and inoculated with  $1e7$  CFU of either *S. aureus* or  $\Delta$ AT. At 24 hours post wounding,  $2 \times 10^6$  HSPC from congenic  $CD45.1^+$  donor mice were adoptively transferred directly into wound beds as shown. (B) After 7 days, mice were euthanized and wounds biopsied. Digested tissue was stained and analyzed by flow cytometry to determine the phenotype of locally expanded  $CD45.1^+$  progeny according to the gating scheme depicted. (C) Relative frequency of locally expanded  $CD45.1^+$   $Ly6G^{hi}$   $Mac1^{hi}$  from mice infected with *S. aureus* versus  $\Delta$ AT is shown. (D) Representative plots showing the prevalence of  $CD45.1^+$  PMN from each group are depicted. Data are expressed as mean $\pm$ SEM and represent 4-5 mice per group. \*  $p < .05$ .

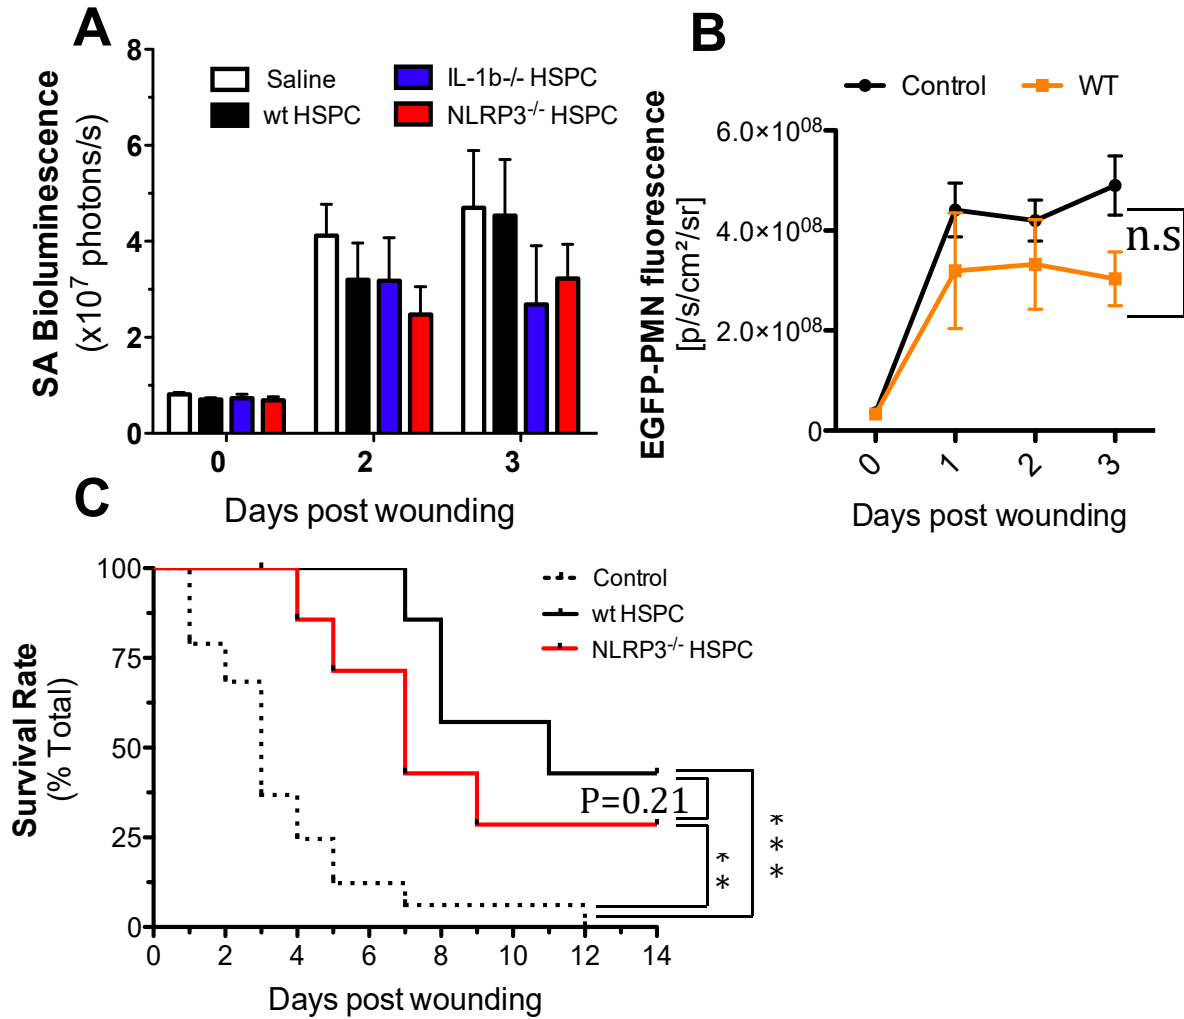

**Supplemental Figure 4. Adoptive transfer of HSPC confers protection from lethal *S. aureus* infection in MyD88<sup>-/-</sup> mice—additional characterization.** MyD88<sup>-/-</sup> or MyD88<sup>-/-</sup> x LysM-EGFP mice were wounded and inoculated with 2e7 CFU of *S. aureus* lux. At 6 hours post inoculation, mice received a local injection of vehicle control or 1x10<sup>5</sup> HSPC derived from wild-type (wt), IL-1β<sup>-/-</sup> or NLRP3<sup>-/-</sup> donors. (A) Bacterial bioluminescence in MyD88<sup>-/-</sup> mice was monitored daily. (B) Endogenous PMN kinetics were measured in MyD88<sup>-/-</sup> x LysM-EGFP over 3 days following wounding and infection. (C) Kaplan-Meier survival plots including NLRP3<sup>-/-</sup> HSPC group. Data represent 2-12 animals per group and are expressed as mean±SEM. \*\* *p* < .01, \*\*\* *p* < .001
